# Supplementary material
Source: Springer Nature journal article supplement (https://www.springermedizin.de/resource/supplementary/13098_2010_53_MOESM1_ESM.pdf/9670410)

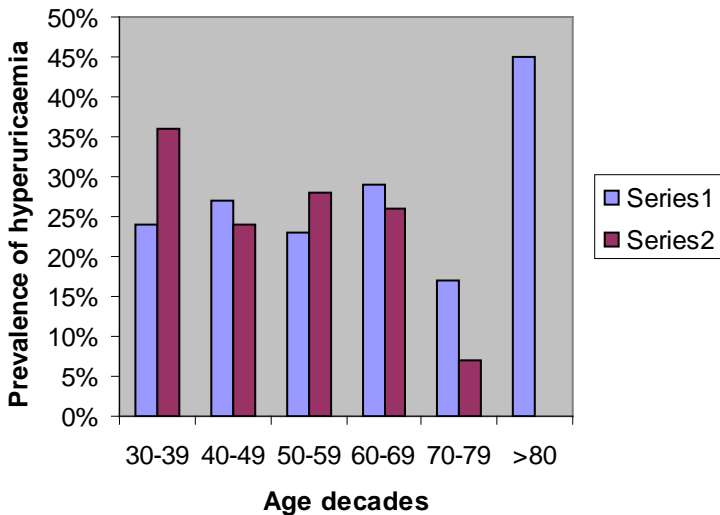

Series 1- Females

Series 2- Males

Supplement: MOESM1 [file 9670410]
